# Supplementary material for: Bibliometric Analysis of Chimeric Antigen Receptor-Based Immunotherapy in Cancers From 2001 to 2021
Source: PubMed Central journal article supplement (PMC9005877; doi:10.3389/fimmu.2022.822004), 2022-03-30
Supplement: DataSheet_1.pdf [file DataSheet_1.pdf]

## Supplementary Material

### Supplementary Figures

□

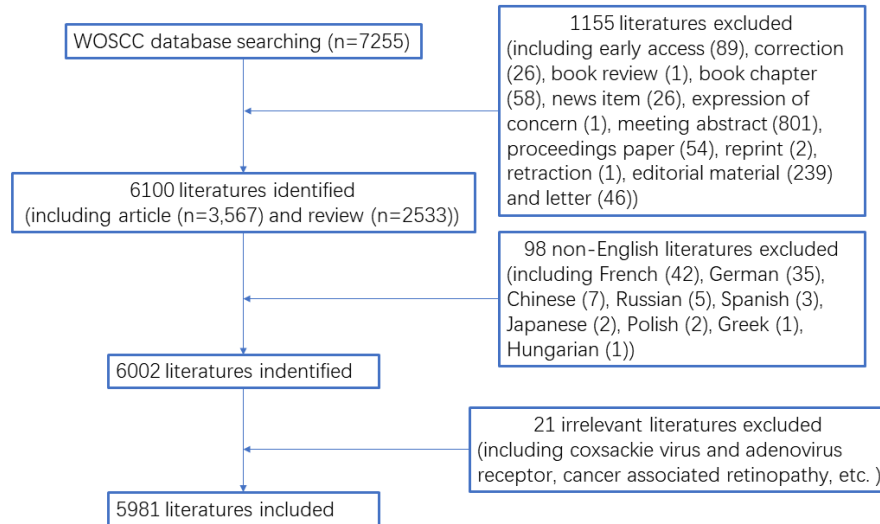

Supplementary Figure 1. The flowchart of the screening procedure.

**A**

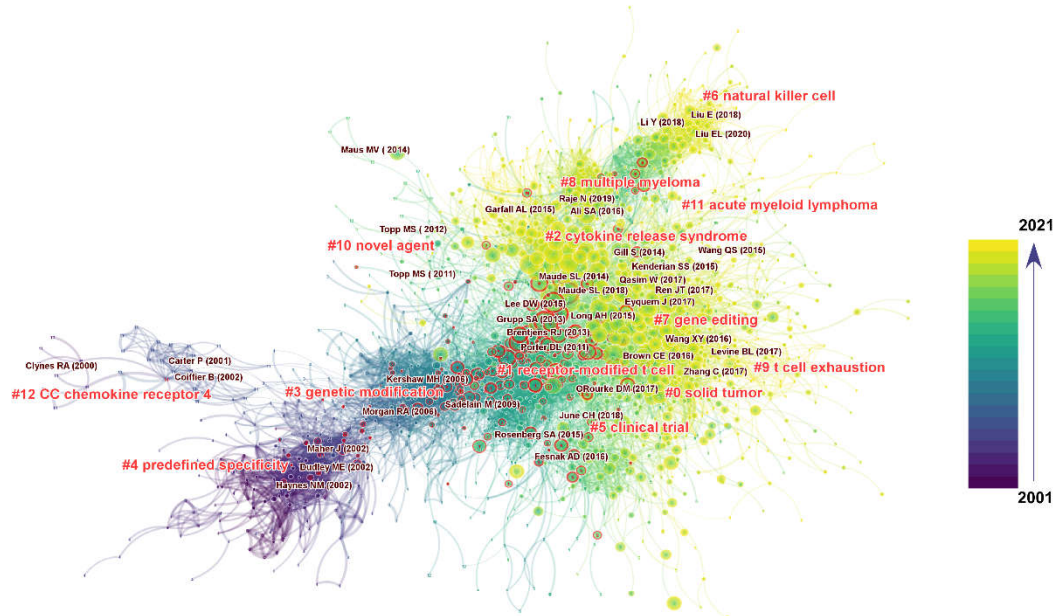

**B**

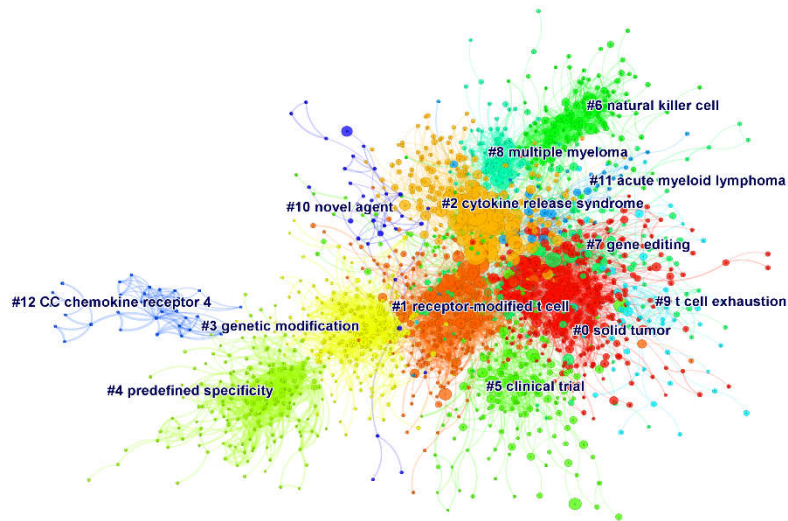

**Supplementary Figure 2.** The knowledge maps of co-cited references. Each node represents an article or review, and each line represents the link between two studies. **(A)** The time-overlay view of the knowledge map of co-cited references. The size of each node represents the number of co-citations, and the red circle around the node represents the bursts of the references. The tag of each cluster is displayed in the figure. The top 3 co-cited references of each cluster are also displayed above the nodes. **(B)** Cluster view of the knowledge map of co-cited references. The tag of each cluster is also displayed in the figure.

## Top 25 References with the Strongest Citation Bursts

| References                                                                                            | Year | Strength | Begin | End  | 2001 - 2021 |
|-------------------------------------------------------------------------------------------------------|------|----------|-------|------|-------------|
| Pule MA, 2008, NAT MED, V14, P1264, DOI 10.1038/nm.1882, <a href="#">DOI</a>                          | 2008 | 83.41    | 2009  | 2013 |             |
| Milone MC, 2009, MOL THER, V17, P1453, DOI 10.1038/mt.2009.83, <a href="#">DOI</a>                    | 2009 | 77.23    | 2009  | 2014 |             |
| Till BG, 2008, BLOOD, V112, P2261, DOI 10.1182/blood-2007-12-128843, <a href="#">DOI</a>              | 2008 | 74.61    | 2009  | 2013 |             |
| Carpenito C, 2009, P NATL ACAD SCI USA, V106, P3360, DOI 10.1073/pnas.0813101106, <a href="#">DOI</a> | 2009 | 68.37    | 2009  | 2014 |             |
| Johnson LA, 2009, BLOOD, V114, P535, DOI 10.1182/blood-2009-03-211714, <a href="#">DOI</a>            | 2009 | 60.69    | 2009  | 2014 |             |
| Morgan RA, 2010, MOL THER, V18, P843, DOI 10.1038/mt.2010.24, <a href="#">DOI</a>                     | 2010 | 129.08   | 2010  | 2015 |             |
| Brentjens R, 2010, MOL THER, V18, P666, DOI 10.1038/mt.2010.31, <a href="#">DOI</a>                   | 2010 | 57.35    | 2010  | 2015 |             |
| Kalos M, 2011, SCI TRANSL MED, V3, P0, DOI 10.1126/scitranslmed.3002842, <a href="#">DOI</a>          | 2011 | 185.42   | 2011  | 2016 |             |
| Savoldo B, 2011, J CLIN INVEST, V121, P1822, DOI 10.1172/JCI46110, <a href="#">DOI</a>                | 2011 | 114.69   | 2011  | 2016 |             |
| Kochenderfer JN, 2010, BLOOD, V116, P4099, DOI 10.1182/blood-2010-04-281931, <a href="#">DOI</a>      | 2010 | 99.48    | 2011  | 2015 |             |
| Robbins PF, 2011, J CLIN ONCOL, V29, P917, DOI 10.1200/JCO.2010.32.2537, <a href="#">DOI</a>          | 2011 | 71.08    | 2011  | 2016 |             |
| Porter DL, 2011, NEW ENGL J MED, V365, P725, DOI 10.1056/NEJMoa1103849, <a href="#">DOI</a>           | 2011 | 229.57   | 2012  | 2016 |             |
| Kochenderfer JN, 2012, BLOOD, V119, P2709, DOI 10.1182/blood-2011-10-384388, <a href="#">DOI</a>      | 2012 | 155.1    | 2012  | 2017 |             |
| Brentjens RJ, 2011, BLOOD, V118, P4817, DOI 10.1182/blood-2011-04-348540, <a href="#">DOI</a>         | 2011 | 125.11   | 2012  | 2016 |             |
| Di Stasi A, 2011, NEW ENGL J MED, V365, P1673, DOI 10.1056/NEJMoa1106152, <a href="#">DOI</a>         | 2011 | 91.77    | 2012  | 2016 |             |
| Louis CU, 2011, BLOOD, V118, P6050, DOI 10.1182/blood-2011-05-354449, <a href="#">DOI</a>             | 2011 | 74.64    | 2012  | 2016 |             |
| Till BG, 2012, BLOOD, V119, P3940, DOI 10.1182/blood-2011-10-387969, <a href="#">DOI</a>              | 2012 | 60.59    | 2012  | 2017 |             |
| Brentjens RJ, 2013, SCI TRANSL MED, V5, P0, DOI 10.1126/scitranslmed.3005930, <a href="#">DOI</a>     | 2013 | 156.55   | 2013  | 2018 |             |
| Topalian SL, 2012, NEW ENGL J MED, V366, P2443, DOI 10.1056/NEJMoa1200690, <a href="#">DOI</a>        | 2012 | 55.37    | 2013  | 2017 |             |
| Grupp SA, 2013, NEW ENGL J MED, V368, P1509, DOI 10.1056/NEJMoa1215134, <a href="#">DOI</a>           | 2013 | 196.96   | 2014  | 2018 |             |
| Sadelain M, 2013, CANCER DISCOV, V3, P388, DOI 10.1158/2159-8290.CD-12-0548, <a href="#">DOI</a>      | 2013 | 72.07    | 2014  | 2018 |             |
| Kloss CC, 2013, NAT BIOTECHNOL, V31, P71, DOI 10.1038/nbt.2459, <a href="#">DOI</a>                   | 2013 | 62.76    | 2014  | 2018 |             |
| Maude SL, 2014, NEW ENGL J MED, V371, P1507, DOI 10.1056/NEJMoa1407222, <a href="#">DOI</a>           | 2014 | 190.9    | 2015  | 2019 |             |
| Davila ML, 2014, SCI TRANSL MED, V6, P0, DOI 10.1126/scitranslmed.3008226, <a href="#">DOI</a>        | 2014 | 116.2    | 2015  | 2019 |             |
| Lee DW, 2014, BLOOD, V124, P188, DOI 10.1182/blood-2014-05-552729, <a href="#">DOI</a>                | 2014 | 58.2     | 2015  | 2019 |             |

Supplementary Figure 3. The top 25 references with strongest citation bursts.

## Supplementary Tables

Table S1. Top 10 co-cited references related to CAR-based immunotherapy in hematopoietic malignances.

| Rank | Reference                                                                                                                                                                                   | Citations | Author                | Year | Type         | Journal                             | IF     | JCR |
|------|---------------------------------------------------------------------------------------------------------------------------------------------------------------------------------------------|-----------|-----------------------|------|--------------|-------------------------------------|--------|-----|
| 1    | Chimeric antigen receptor t cells for sustained remissions in leukemia                                                                                                                      | 2952      | Maude, Shannon L      | 2014 | Article (CT) | The New England Journal of Medicine | 91.245 | Q1  |
| 2    | Chimeric antigen receptor–modified T cells for acute lymphoid leukemia                                                                                                                      | 2195      | Grupp, Stephan A      | 2013 | Article (CT) | The New England Journal of Medicine | 91.245 | Q1  |
| 3    | Axicabtagene Ciloleucel CAR T-cell therapy in refractory large B-cell lymphoma                                                                                                              | 1960      | Neelapu, Sattva S     | 2017 | Article (CT) | The New England Journal of Medicine | 91.245 | Q1  |
| 4    | Tisagenlecleucel in children and young adults with B-cell lymphoblastic leukemia                                                                                                            | 1886      | Maude, Shannon L      | 2018 | Article (CT) | The New England Journal of Medicine | 91.245 | Q1  |
| 5    | T cells expressing CD19 chimeric antigen receptors for acute lymphoblastic leukaemia in children and young adults: a phase 1 dose-escalation trial                                          | 1699      | Lee, Daniel W         | 2015 | Article (CT) | LANCET                              | 79.321 | Q1  |
| 6    | Efficacy and toxicity management of 19-28z CAR T cell therapy in B cell acute lymphoblastic leukemia                                                                                        | 1548      | Davila, Marco L       | 2014 | Article (CT) | Science Translational Medicine      | 17.956 | Q1  |
| 7    | CD19-targeted T cells rapidly induce molecular remissions in adults with chemotherapy-refractory acute lymphoblastic leukemia                                                               | 1342      | Brentjens, Renier J   | 2013 | Article (CT) | Science Translational Medicine      | 17.956 | Q1  |
| 8    | Chemotherapy-refractory diffuse large B-cell lymphoma and indolent B-cell malignancies can be effectively treated with autologous T cells expressing an anti-CD19 chimeric antigen receptor | 1028      | Kochenderfer, James N | 2015 | Article (CT) | Journal of Clinical Oncology        | 44.544 | Q1  |
| 9    | CD19 CAR–T cells of defined CD4+:CD8+ composition in adult B cell ALL patients                                                                                                              | 1001      | Turtle, Cameron J     | 2016 | Article (CT) | Journal of Clinical Investigation   | 14.808 | Q1  |
| 10   | Chimeric antigen receptor T cells persist and induce sustained remissions in relapsed refractory chronic lymphocytic leukemia                                                               | 989       | Porter, David L       | 2015 | Article (CT) | Science Translational Medicine      | 17.956 | Q1  |

CT, clinical trial; IF, impact factors; JCR, journal citation reports; Citation data was updated to 21<sup>st</sup> February, 2022.

Table S2. Top 10 co-cited references related to CAR-based immunotherapy in solid tumors.

| Rank | Reference                                                                                                                                                         | Citations | Author               | Year | Type         | Journal                             | IF     | JCR |
|------|-------------------------------------------------------------------------------------------------------------------------------------------------------------------|-----------|----------------------|------|--------------|-------------------------------------|--------|-----|
| 1    | Case report of a serious adverse event following the administration of T cells transduced with a chimeric antigen receptor recognizing ErbB2                      | 1479      | Morgan, Richard A    | 2010 | Article (CR) | Molecular Therapy                   | 11.454 | Q1  |
| 2    | Tumor regression in patients with metastatic synovial cell sarcoma and melanoma using genetically engineered lymphocytes reactive with NY-ESO-1                   | 1049      | Robbins, Paul F      | 2011 | Article (CT) | Journal of Clinical Oncology        | 44.544 | Q1  |
| 3    | Antitumor activity and long-term fate of chimeric antigen receptor–positive T cells in patients with neuroblastoma                                                | 846       | Louis, Chrystal U    | 2016 | Article (CT) | Blood                               | 22.113 | Q1  |
| 4    | Regression of Glioblastoma after Chimeric Antigen Receptor T-Cell Therapy                                                                                         | 742       | Brown, Christine E   | 2016 | Article (CR) | The New England Journal of Medicine | 91.245 | Q1  |
| 5    | Virus-specific T cells engineered to coexpress tumor-specific receptors: persistence and antitumor activity in individuals with neuroblastoma                     | 710       | Pule, Martin A       | 2008 | Article (CT) | Nature Medicine                     | 53.440 | Q1  |
| 6    | A single dose of peripherally infused EGFRvIII-directed CAR T cells mediates antigen loss and induces adaptive resistance in patients with recurrent glioblastoma | 646       | O'Rourke, Donald M   | 2017 | Article (CT) | Science Translational Medicine      | 17.956 | Q1  |
| 7    | Human epidermal growth factor receptor 2 (HER2)–specific chimeric antigen receptor–modified T cells for the immunotherapy of HER2-positive sarcoma                | 542       | Ahmed, Nabil         | 2015 | Article (CT) | Journal of Clinical Oncology        | 44.544 | Q1  |
| 8    | Combinatorial antigen recognition with balanced signaling promotes selective tumor eradication by engineered T cells                                              | 530       | Kloss, Christopher C | 2013 | Article      | Nature Biotechnology                | 54.908 | Q1  |
| 9    | Mesothelin-specific chimeric antigen receptor mRNA-engineered T cells induce antitumor activity in solid malignancies                                             | 499       | Beatty, Gregory L.   | 2014 | Article (CR) | Cancer Immunology Research          | 11.151 | Q2  |
| 10   | Human CAR T cells with cell-intrinsic PD-1 checkpoint blockade resist tumor-mediated inhibition                                                                   | 457       | Leonid, Cherkassky   | 2016 | Article      | Journal of Clinical Investigation   | 14.808 | Q1  |

CT, clinical trial; CR, case report; IF, impact factors; JCR, journal citation reports; Citation data was updated to 21<sup>st</sup> February, 2022.

Table S3. Summary of target antigens in CAR-based immunotherapy.

| Target antigen            | CAR-based cell type         | Cancer type      | Specific cancer type                                                                                                                                                                                                    | Occurrence | Total link strength | Highest level of clinical trial phase |
|---------------------------|-----------------------------|------------------|-------------------------------------------------------------------------------------------------------------------------------------------------------------------------------------------------------------------------|------------|---------------------|---------------------------------------|
| CD19                      | T/NK/iNKT/ $\gamma\delta$ T | liquid           | ALL, BCL, BL, CLL, DLBCL, FL, Mantle cell and follicular lymphoma, MALT, PMBCL                                                                                                                                          | 419        | 4807                | FDA approved                          |
| CD20                      | T                           | liquid           | Relapsed and refractory BCL, CLL, DLBCL, FL, MCL, NHL                                                                                                                                                                   | 88         | 1111                | 1/2                                   |
| BCMA                      | T/NK                        | liquid           | MM                                                                                                                                                                                                                      | 67         | 826                 | 1/2                                   |
| CD38                      | T                           | liquid           | AML, Relapsed or refractory MM                                                                                                                                                                                          | 41         | 492                 | 1/2                                   |
| CD30                      | T                           | liquid           | HL                                                                                                                                                                                                                      | 28         | 345                 | 1/2                                   |
| CD123                     | T/NK                        | liquid           | AML                                                                                                                                                                                                                     | 27         | 336                 | 1/2                                   |
| CD22                      | T/NK                        | liquid           | Refractory BCL, Relapsed or refractory DLBCL, B-ALL                                                                                                                                                                     | 26         | 313                 | Early 1                               |
| CD33                      | T/NK                        | liquid           | AML                                                                                                                                                                                                                     | 21         | 240                 | 1/2                                   |
| CD5                       | T/NK                        | liquid           | T-cell ALL, T-cell NHL                                                                                                                                                                                                  | 16         | 190                 | 1/2                                   |
| CS1                       | T/NK                        | liquid           | Recurrent or refractory PCM, Relapsed or Refractory MM                                                                                                                                                                  | 11         | 122                 | 1                                     |
| CD138                     | T                           | liquid           | Relapsed or refractory MM                                                                                                                                                                                               | 7          | 80                  | 1                                     |
| CD7                       | T/NK                        | liquid           | ALL, T-cell leukemia, lymphoma                                                                                                                                                                                          | 4          | 36                  | 1/2                                   |
| ROR1                      | T                           | liquid/<br>solid | Recurrent ALL, Recurrent MCL, Refractory CLL, NSCLC, Breast cancer                                                                                                                                                      | 18         | 183                 | 1                                     |
| CD70                      | T                           | liquid/<br>solid | AML, NHL, MM, Pancreatic cancer, Renal cell cancer, Breast cancer, Melanoma, Ovarian cancer                                                                                                                             | 6          | 57                  | 1/2                                   |
| HER2                      | T/NK                        | solid            | Glioblastoma, Colorectal cancer, Sarcoma, Biliary tract cancer, Pancreatic cancer                                                                                                                                       | 113        | 1423                | 1/2                                   |
| Mesothelin                | T/NK                        | solid            | Ovarian cancer, Pleural mesothelioma, Pancreatic cancer                                                                                                                                                                 | 103        | 1211                | Early 1                               |
| NKG2D ligands             | NK/ $\gamma\delta$ T        | solid            | Solid tumors                                                                                                                                                                                                            | 94         | 1163                | 1                                     |
| GD2                       | T/iNKT                      | solid            | Neuroblastoma, Melanoma                                                                                                                                                                                                 | 69         | 868                 | 1                                     |
| EGFR                      | T                           | solid            | NSCLC                                                                                                                                                                                                                   | 62         | 694                 | 1                                     |
| MUC1                      | T/NK                        | solid            | NSCLC, Hepatic cancer, Pancreas cancer, Breast cancer, Colon cancer, Gastric cancer                                                                                                                                     | 46         | 570                 | 1/2                                   |
| EGFRvIII                  | T                           | solid            | Glioblastoma                                                                                                                                                                                                            | 35         | 434                 | 1                                     |
| B7-H3                     | T                           | solid            | Pediatric solid tumor, Ovarian cancer, Neuroblastoma, Diffuse intrinsic pontine glioma, Diffuse midline glioma, Recurrent and refractory pediatric central nervous system tumors, Recurrent and refractory glioblastoma | 32         | 324                 | 1/2                                   |
| Folate receptor- $\alpha$ | T                           | solid            | Ovarian cancer                                                                                                                                                                                                          | 28         | 401                 | 1                                     |
| CEA                       | T                           | solid            | Colorectal cancer, Gastro-esophageal cancer, Pseudomyxoma peritonei, Pancreatic cancer, Liver                                                                                                                           | 25         | 299                 | 1                                     |

|          |      |       | metastases                                                                    |    |     |             |
|----------|------|-------|-------------------------------------------------------------------------------|----|-----|-------------|
| c-MET    | T    | solid | Breast cancer                                                                 | 16 | 172 | 0           |
| NY-ESO-1 | T    | solid | Esophagus cancer                                                              | 10 | 134 | 1/2         |
| PSMA     | T/NK | solid | Prostate cancer                                                               | 10 | 131 | 1           |
| CD44v6   | T    | solid | CD44v6 positive cancers                                                       | 6  | 77  | 1/2         |
| GPC3     | T/NK | solid | Colorectal cancer, Hepatocellular Carcinoma                                   | 6  | 64  | 1           |
| AXL      | T    | solid | Liver Cancer, Lung Cancer, Breast Cancer, Colo-<br>rectal Cancer, Brain Tumor | 4  | 45  | 1           |
| IL13Ra2  | T    | solid | Glioblastoma                                                                  | 3  | 41  | Case report |
| FAP      | T    | solid | Malignant pleural mesothelioma                                                | 3  | 30  | 1           |
| CD171    | T    | solid | Neuroblastoma                                                                 | 2  | 28  | 1           |
| TAG-72   | T    | solid | Colorectal cancer                                                             | 2  | 27  | 1           |
| Lewis-Y  | T    | solid | Liver Cancer, Lung cancer, Breast cancer, Colo-<br>rectal cancer, Brain tumor | 1  | 15  | 1           |
| CAIX     | T    | solid | Renal cell carcinoma                                                          | 1  | 13  | 1           |

AML, acute myelocytic leukemia; B-ALL, B cell acute lymphoblastic leukemia; BCL, B-cell lymphoma; BL, Burkitt's lymphoma; CLL, chronic lymphocytic leukemia; DLBCL, diffuse large B cell lymphoma; FL, follicular lymphoma; HL, Hodgkin lymphoma; MALT, mucosa-associated lymphoid tissue; MM, multiple myeloma; NHL, non-Hodgkin lymphoma; MCL, mantle cell lymphoma; NSCLC, non-small cell lung cancer; PCM, plasma cell myeloma; PMBCL, primary mediastinal B cell lymphoma.

Table S4. The major limitations of CAR-based immunotherapy and the potential strategies.

| Limitations                    | Potential strategies                                                                                                                                                                                                                                                                                                                                                                                                                       |
|--------------------------------|--------------------------------------------------------------------------------------------------------------------------------------------------------------------------------------------------------------------------------------------------------------------------------------------------------------------------------------------------------------------------------------------------------------------------------------------|
| Antigen heterogeneity          | Next-generation sequencing technologies to discover the neoantigens or neoepitopes                                                                                                                                                                                                                                                                                                                                                         |
| Antigen escape                 | Sequential use of different CAR-based products<br>Multi-CAR constructs (OR gate)<br>CAR-BiTE constructs                                                                                                                                                                                                                                                                                                                                    |
| TME of solid tumors            | Overcome the biological barriers<br>Local delivery systems<br>Anti-vasculature agents, chemokines or oncolytic viruses<br>Facilitate CAR-based products to generate chemokines or heparinase<br>Combination therapies with exogenous antagonists or cytokines<br>Removal of specific immunosuppressive factors in effector cells (MDSCs depletion)<br>Metabolic reprogramming<br>Modification of CAR structure to avoid immune-suppression |
| T cell exhaustion              | Combination of checkpoint inhibitor with CAR-T (anti-PD-1/PD-L1 mAb)<br>PD-1 knockout autologous CAR T cells<br>CAR-exosomes derived from CAR-T cells                                                                                                                                                                                                                                                                                      |
| Toxicity (CRS, CRES, HLH, MAS) | Pharmacological interventions<br>Blockade of IL receptor (anti-IL-6R mAb)<br>Neutralization of cytokines (anti-IL-6 mAb)<br>Corticosteroids<br>Supportive care<br>Predictive system based on valid biomarkers<br>Prophylactic drug administration<br>"Safer CAR" construct<br>iCasp9 "suicide switch"<br>Tet-On inducible "remote-controlled switch"<br>Multi-CAR constructs (NOT or AND gate)<br>Tuning CAR affinity                      |
| Financial burden               | Off-the-shelf CAR-based products<br>Novel gene engineering techniques<br>CRISPR-Cas9<br>CAR-T cell produced in vivo through mRNA/LNP system                                                                                                                                                                                                                                                                                                |

BiTE, bispecific T-cell engager; TME, tumor microenvironment; CRS, cytokine-release syndrome; CRES, CRS-related encephalopathy syndrome; HLH, hemophagocytic lymphohistiocytosis; MAS, macrophage activation syndrome; LNP, Lipid nanoparticles.
